# Supplementary material
Source: HighWire-hosted journal article supplement (https://rmdopen.bmj.com/content/10/2/e004199)
Supplement: inline-supplementary-material-1 [file inline-supplementary-material-1.pdf]

Supplementary table 1. Baseline characteristics of included patients with radiographic axial spondyloarthritis.

|                                                                                                                                                                                                                                                                                                                                                                                                                                                            | Total study population<br>(N=58) | Patients with facet joint<br>ankylosis development<br>(n=19) | Patients without facet joint<br>ankylosis development<br>(n=39) |
|------------------------------------------------------------------------------------------------------------------------------------------------------------------------------------------------------------------------------------------------------------------------------------------------------------------------------------------------------------------------------------------------------------------------------------------------------------|----------------------------------|--------------------------------------------------------------|-----------------------------------------------------------------|
| Age at inclusion<br>(years)                                                                                                                                                                                                                                                                                                                                                                                                                                | 49 (9.7)                         | 49 (8.2)                                                     | 49 (10.5)                                                       |
| Gender (male)                                                                                                                                                                                                                                                                                                                                                                                                                                              | 49 (84%)                         | 17 (89%)                                                     | 32 (82%)                                                        |
| HLA-B27 status                                                                                                                                                                                                                                                                                                                                                                                                                                             | 49 (84%)                         | 14 (74%)                                                     | 35 (90%)                                                        |
| Uveitis                                                                                                                                                                                                                                                                                                                                                                                                                                                    | 15 (26%)                         | 5 (26%)                                                      | 10 (26 %)                                                       |
| Psoriasis                                                                                                                                                                                                                                                                                                                                                                                                                                                  | 5 (9%)                           | 2 (11%)                                                      | 3 (8%)                                                          |
| IBD                                                                                                                                                                                                                                                                                                                                                                                                                                                        | 3 (5%)                           | 2 (11%)                                                      | 1 (3%)                                                          |
| Heel enthesitis                                                                                                                                                                                                                                                                                                                                                                                                                                            | 7 (12%)                          | 3 (16%)                                                      | 4 (10%)                                                         |
| Dactylitis                                                                                                                                                                                                                                                                                                                                                                                                                                                 | 5 (9%)                           | 3 (16%)                                                      | 2 (5%)                                                          |
| Peripheral arthritis                                                                                                                                                                                                                                                                                                                                                                                                                                       | 9 (16%)                          | 4 (21%)                                                      | 5 (13%)                                                         |
| CRP (mg/L)                                                                                                                                                                                                                                                                                                                                                                                                                                                 | 12.0 (17.7)                      | 12.3 (17.7)                                                  | 11.8 (18.0)                                                     |
| Elevated CRP                                                                                                                                                                                                                                                                                                                                                                                                                                               | 31 (53%)                         | 11 (58%)                                                     | 20 (51%)                                                        |
| NSAID use                                                                                                                                                                                                                                                                                                                                                                                                                                                  | 37 (64%)                         | 13 (68%)                                                     | 24 (62%)                                                        |
| csDMARD use                                                                                                                                                                                                                                                                                                                                                                                                                                                | 14 (24%)                         | 6 (32%)                                                      | 8 (21%)                                                         |
| TNFi use                                                                                                                                                                                                                                                                                                                                                                                                                                                   | 16 (28%)                         | 8 (42%)                                                      | 8 (21%)                                                         |
| ASDAS                                                                                                                                                                                                                                                                                                                                                                                                                                                      | 2.6 (1.2)                        | 2.6 (1.3)                                                    | 2.5 (1.2)                                                       |
| High disease activity<br>(ASDAS≥2.1)                                                                                                                                                                                                                                                                                                                                                                                                                       | 33 (57%)                         | 10 (53%)                                                     | 23 (59%)                                                        |
| Results reflect mean (standard deviation) or n (%), as appropriate<br>axSpA; axial spondyloarthritis, HLA-B27; Human Leukocyte Antigen B27, IBD; Inflammatory Bowel Disease, CRP; C-Reactive Protein, ESR; Erythrocyte Sedimentation Rate, NSAID; Non-Steroidal Anti-Inflammatory Drug, csDMARD; conventional synthetic Disease-Modifying AntiRheumatic Drug, TNFi; tumor necrosis factor inhibitor, ASDAS; Axial Spondyloarthritis Disease Activity Score |                                  |                                                              |                                                                 |
